# Supplementary material for: Deposition of Tetracoordinate Co(II) Complex with Chalcone Ligands on Graphene
Source: PubMed Central journal article supplement (PMC7662825; doi:10.3390/molecules25215021), 2020-10-29
Supplement: molecules-25-05021-s001.pdf [file molecules-25-05021-s001.pdf]

*Supplementary Materials*

# Deposition of tetracoordinate Co(II) complex with chalcone ligands on graphene

**Jakub Hrubý<sup>1</sup>, Šárka Vavrečková<sup>1,2</sup>, Lukáš Masaryk<sup>3</sup>, Antonín Sojka<sup>1</sup>, Jorge Navarro-Giraldo<sup>1</sup>, Miroslav Bartoš<sup>1</sup>, Radovan Herchel<sup>3</sup>, Ján Moncol<sup>4</sup>, Ivan Nemeč<sup>1,3</sup> and Petr Neugebauer<sup>1,\*</sup>**

<sup>1</sup> Central European Institute of Technology, CEITEC BUT, Purkyňova 656/123, 61200 Brno, Czech Republic;

<sup>2</sup> Institute of Physical Engineering, Faculty of Mechanical Engineering, Brno University of Technology, Technická 2, 61669 Brno, Czech Republic

<sup>3</sup> Department of Inorganic Chemistry, Faculty of Science, Palacký University, 17. listopadu 12, 77147 Olomouc, Czech Republic

<sup>4</sup> Department of Inorganic Chemistry, Faculty of Chemical and Food Technology, Slovak University of Technology in Bratislava, 81237 Bratislava, Slovakia

\* Correspondence: petr.neugebauer@ceitec.vutbr.cz;

Received: date; Accepted: date; Published: date

**Table S1.** Comparison of Raman shift peaks (in  $\text{cm}^{-1}$ ). Peak intensity is denoted as follows: strong - s, medium - m, weak - w.

| Powder Co(II) | CVD graphene | Co(II) on graphene drop-cast | Co(II) on graphene sublimation at 75 °C | Co(II) on graphene sublimation at 265 °C |
|---------------|--------------|------------------------------|-----------------------------------------|------------------------------------------|
|               | 301m         | 304w                         | 307w                                    |                                          |
|               |              |                              |                                         |                                          |
| 409w          |              |                              |                                         |                                          |
|               | 430w         | 435w                         |                                         |                                          |
| 520s          | 520s         | 523s                         | 523s                                    | 521s                                     |
|               |              |                              |                                         | 594w                                     |
| 637w          | 618w         | 628w                         |                                         | 637w                                     |
|               | 669w         | 674w                         |                                         |                                          |
|               |              |                              |                                         |                                          |
| 774m          |              |                              |                                         | 777w                                     |
| 811w          | 821w         |                              |                                         |                                          |
| 877w          |              |                              |                                         |                                          |
| 895w          |              |                              |                                         | 897w                                     |
| 964m          | 946-976m     | 946-976m                     | 964m                                    | 946-976m                                 |
| 984m          |              |                              |                                         | 989m                                     |
| 1029w         |              |                              | 1034w                                   | 1036w                                    |
| 1116w         |              | 1112w                        |                                         |                                          |
|               |              |                              |                                         | 1168m                                    |
| 1186m         |              | 1190w                        | 1193m                                   | 1190w                                    |
| 1220w         |              |                              | 1228w                                   | 1224m                                    |
| 1264w         |              |                              | 1262w                                   | 1261w                                    |
| 1308m         |              |                              | 1307m                                   | 1306w                                    |
|               | 1347m        | 1346m                        | 1343m                                   | 1341m                                    |
| 1366m         |              |                              | 1372w                                   | 1370w                                    |
| 1425w         |              |                              | 1432w                                   | 1424w                                    |
|               |              |                              | 1493w                                   | 1489w                                    |
| 1529w         |              |                              |                                         | 1519w                                    |
| 1577m         |              |                              |                                         |                                          |
|               | 1595m        | 1591m                        | 1596m                                   | 1589s                                    |
| 1603s         |              |                              | 1603s                                   | 1603s                                    |
|               | 1626w        |                              |                                         |                                          |
| 1656w         |              |                              | 1656w                                   | 1654w                                    |
|               | 2462w        | 2463w                        |                                         | 2463w                                    |
|               | 2689m        | 2682m                        | 2678m                                   | 2679m                                    |
|               | 2939w        | 2950w                        | 2945w                                   | 2950w                                    |
|               |              |                              |                                         | 3022w                                    |
|               |              |                              |                                         | 3070w                                    |

**Figure S1** shows the AFM images with profiles from white lines. The drop-cast sample consists of nanodroplets up to 50 nm high. On the contrary, sublimated samples resulted in the formation of microcrystals hundreds of nanometers high.

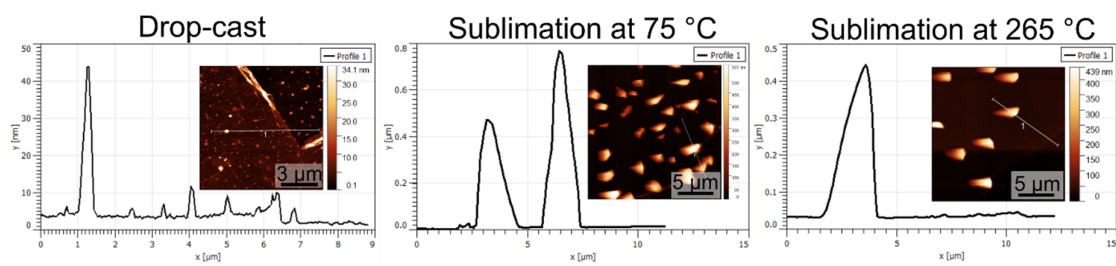

**Figure S1.** AFM images from drop-cast and sublimated samples at 75 °C and 265 °C.

**Figure S2** shows a weak signal from Co 2p found on the surface after drop-cast. The right side of the image shows the fit in the CasaXPS program with a weak Co 2p peak detected.

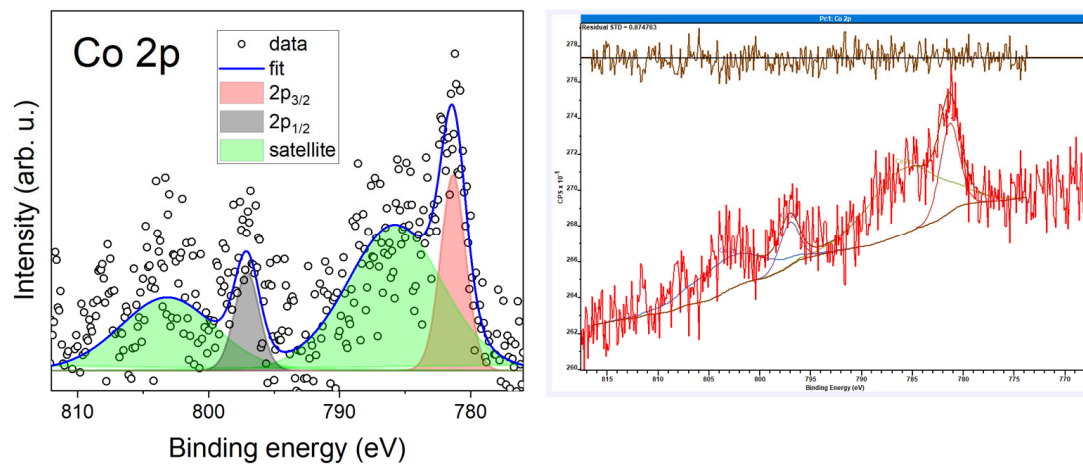

**Figure S2.** Weak Co 2p peak from the drop-cast sample.

**Figure S3** illustrates the semi-empirical quantitative analysis of elemental composition for the studied complex of powder taken from crucible after sublimation at 75 °C and 265 °C. The red line denotes the calculated ideal percental amount of each element from the compound  $\text{CoC}_{38}\text{H}_{32}\text{Cl}_2\text{N}_4\text{O}_4$ . Histograms illustrate that cobalt and chlorine content increases as the sublimation temperature rises; this means that cobalt stays in the crucible and supports the observation of no cobalt detected on the surface of microcrystallites after thermal sublimation.

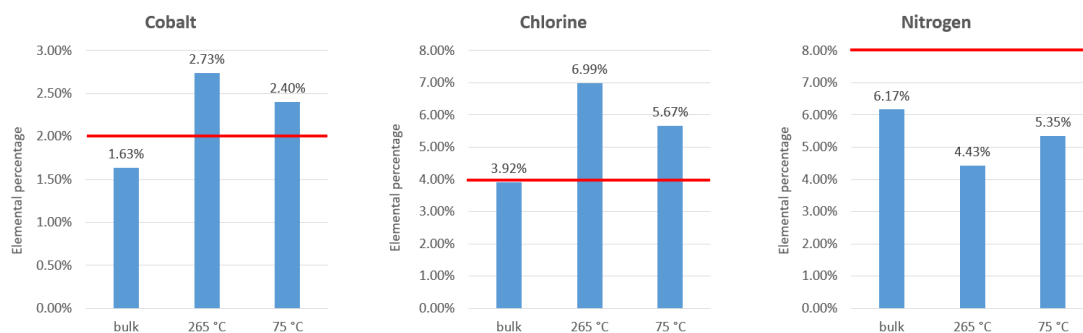

**Figure S3.** Elemental percentage of atoms in powder from crucible after thermal sublimation at 75 °C and 265 °C.
